# Supplementary material for: Highly diversified crop–livestock farming systems reshape wild bird communities
Source: PubMed Central journal article supplement — Ecol Appl. 2019 Dec 2;30(2):e02031. doi: 10.1002/eap.2031 (PMC7078872; doi:10.1002/eap.2031), 2019-12-02
Supplement: EAP-30-e02031-s001.pdf [file EAP-30-e02031-s001.pdf]

**Supporting Information.** Olivia M. Smith, Christina M. Kennedy, Jeb P. Owen, Tobin D. Northfield, Christopher E. Latimer, William E. Snyder. 2019. Highly diversified crop–livestock farming systems reshape wild bird communities. *Ecological Applications*.

## Appendix S1

**Table S1.** List of variables used in models, hypothesized impact of variable on farm birds, and hypothesized mechanisms.

| <b>Variable</b>                                   | <b>Hypothesized impact</b>                                                                                                                                            | <b>Mechanism(s)</b>                                                                                                                                                                                                                                                                                                                                                                                                               |
|---------------------------------------------------|-----------------------------------------------------------------------------------------------------------------------------------------------------------------------|-----------------------------------------------------------------------------------------------------------------------------------------------------------------------------------------------------------------------------------------------------------------------------------------------------------------------------------------------------------------------------------------------------------------------------------|
| Bird Conservation Region (BCR)                    | Each region represents unique community structures<br><br>Greater impact on foraging guilds common to grassland or intensified arable landscapes (Coastal California) | - Regions delineated by unique biomes (Sauer et al. 2003)<br>- Grassland/intensified arable landscapes (Coastal California) may attract granivores and omnivores through food resources (Kennedy et al. 2010, Gove et al. 2013, Dross et al. 2018)<br>- Smaller impact on insectivorous species which may be more abundant in the forests of the Pacific Northwest Rainforest Region (Kennedy and Marra 2010, Otieno et al. 2011) |
| Natural habitat in the landscape (% Natural Land) | Increase native density and richness; decrease invasive density                                                                                                       | - Native species may be more common in landscapes with more native habitat (Batáry, Matthiesen, & Tschardt, 2010; Otieno, Gichuki, Farwig, & Kiboi, 2011; Wilson et al., 2017), though the greater richness of native compared to non-native species may reduce total impact due to diverse habitat                                                                                                                               |

|                                                  |                                                                                                                                                     |                                                                                                                                                                                                                                                                                                                                                                                                                                                                                                                                                                                                                                             |
|--------------------------------------------------|-----------------------------------------------------------------------------------------------------------------------------------------------------|---------------------------------------------------------------------------------------------------------------------------------------------------------------------------------------------------------------------------------------------------------------------------------------------------------------------------------------------------------------------------------------------------------------------------------------------------------------------------------------------------------------------------------------------------------------------------------------------------------------------------------------------|
|                                                  |                                                                                                                                                     | <p>requirements of communities across farms (Rodewald, 2015)</p> <ul style="list-style-type: none"> <li>- Invasive species should be more common in less-natural landscapes (Rodewald, 2015)</li> <li>- Granivorous/omnivorous species may be most numerous on farms embedded in the least natural landscapes, while insectivores may increase or not respond to increasing natural habitat in the landscape (Kennedy et al. 2010, Gove et al. 2013, Dross et al. 2018)</li> </ul>                                                                                                                                                          |
| Crop–livestock integration (CLS)                 | Increase density and richness of all guilds                                                                                                         | <ul style="list-style-type: none"> <li>- CLS will have more diverse habitat types/higher heterogeneity (landscape complementation) (Benton et al. 2003, Tschardt et al. 2012); high heterogeneity may reduce patch sizes and increase foraging (see below) (Somers and Morris 2002, Boesing et al. 2017)</li> <li>- CLS will have greater addition of pasture/hay for grassland birds</li> <li>- CLS will have greater food provisioning (grain, insects on feces and bodies) (Evans et al. 2006, Carlson et al. 2015, Hald et al. 2016)</li> <li>- CLS will have more nesting structures (Hiron et al. 2013, Šálek et al. 2017)</li> </ul> |
| Livestock presence at point (Livestock at point) | Increase density and richness of granivorous, insectivorous, and structure nesting birds that can benefit from local physical presence of livestock | <ul style="list-style-type: none"> <li>- Presence at point will have greater food provisioning (grain, insects on feces and bodies) (Evans et al. 2006, Carlson et al. 2015, Hald et al. 2016)</li> <li>- Presence at point will have more nesting structures</li> </ul>                                                                                                                                                                                                                                                                                                                                                                    |

|                                                                                                                        |                                                                                                                                                                                                      |                                                                                                                                                                                                                                                                                                                                                                                                                                                                                                                                                                                                                                                                                                                                                                         |
|------------------------------------------------------------------------------------------------------------------------|------------------------------------------------------------------------------------------------------------------------------------------------------------------------------------------------------|-------------------------------------------------------------------------------------------------------------------------------------------------------------------------------------------------------------------------------------------------------------------------------------------------------------------------------------------------------------------------------------------------------------------------------------------------------------------------------------------------------------------------------------------------------------------------------------------------------------------------------------------------------------------------------------------------------------------------------------------------------------------------|
|                                                                                                                        |                                                                                                                                                                                                      | (Hiron et al. 2013, Šálek et al. 2017)                                                                                                                                                                                                                                                                                                                                                                                                                                                                                                                                                                                                                                                                                                                                  |
| Natural habitat in landscape × Crop–livestock system                                                                   | Greatest benefits of livestock integration in least natural landscapes                                                                                                                               | <ul style="list-style-type: none"> <li>- The greatest benefits of farm diversification are often proposed to be seen in more simplified landscapes (e.g., 1-20% non-crop habitat) where the provision of local resources are not redundant with the resources in the surrounding landscape (Batáry et al. 2010, Geiger et al. 2010, Tschardt et al. 2012, Tuck et al. 2014).</li> <li>- Refugia, nesting habitat, and food resources are of highest benefit in simplified landscapes where resources are not redundant (Tschardt et al. 2012)</li> </ul>                                                                                                                                                                                                                |
| On-farm crop field size, patch richness, structures/ha, and percentage land in row crops, woody crops, and pasture/hay | <p>These variables change when livestock are integrated and directly increase wild bird density and richness</p> <p>Farming system will have greater predictive power than individual components</p> | <ul style="list-style-type: none"> <li>- Smaller field sizes often associated with lower pesticide and herbicide input (and thus more food) (Yan and Roy 2016); often associated with higher field heterogeneity (Fahrig et al. 2015). Birds should have higher foraging rates due to higher edge:interior ratio (Somers and Morris 2002, Boesing et al. 2017).</li> <li>- Patch richness increases bird abundance and richness through landscape complementation (Benton et al. 2003, Tschardt et al. 2012)</li> <li>- Increased structures/ha promote nesting by structure nesting species (Hiron et al. 2013, Šálek et al. 2017)</li> <li>- Frequent disturbance in row crops may attract ground foragers by increasing access to soil biota and reducing</li> </ul> |

|                  |                                                                                 |                                                                                                                                                                                                                                                                                                                                                                                                                                                                                                                                                                                                                                                                                                                                   |
|------------------|---------------------------------------------------------------------------------|-----------------------------------------------------------------------------------------------------------------------------------------------------------------------------------------------------------------------------------------------------------------------------------------------------------------------------------------------------------------------------------------------------------------------------------------------------------------------------------------------------------------------------------------------------------------------------------------------------------------------------------------------------------------------------------------------------------------------------------|
|                  |                                                                                 | <p>weeds; conversely, may reduce other guilds through structural simplification (Kennedy et al. 2017)</p> <ul style="list-style-type: none"> <li>- Woody crops may promote arboreal birds and provide cavities for nesting (Petit and Petit 2003, Haslem and Bennett 2008, Boesing et al. 2017)</li> <li>- Pasture/hay may promote grassland species (Petit and Petit 2003, Haslem and Bennett 2008)</li> </ul> <p>-Farming system will have a greater impact than individual factors by combining benefits of each to impact a diverse range of species. The individual impacts of each farm variable may influence several species, while the sum of the parts could influence more species to have a greater total effect.</p> |
| <p>Farm size</p> | <p>Increasing farm size decreases densities and richness of all bird guilds</p> | <ul style="list-style-type: none"> <li>- Larger farms have larger patch sizes (fields, pastures, etc.) (see hypotheses above, Fig. 4, and Fig. S2, S4, and S9 below)</li> <li>- Larger farms may have more row crop (see hypotheses above, Fig. 4, and Fig. S2, S4, and S9 below) and otherwise more simplified habitats, with greater intensification and mechanization to meet profit needs to cover machinery, land, and input costs (Frei et al. 2018) (Fig. S9 below)</li> <li>- Smaller farms may have greater crop diversification (Frei et al. 2018), particularly if they switch from contracts with large wholesalers</li> </ul>                                                                                        |

|                            |                                                                                    |                                                                                                                                                                                                                                                                                                                                                                   |
|----------------------------|------------------------------------------------------------------------------------|-------------------------------------------------------------------------------------------------------------------------------------------------------------------------------------------------------------------------------------------------------------------------------------------------------------------------------------------------------------------|
|                            |                                                                                    | including only a few crops with high production requirements to providing weekly produce for Community Supported Agriculture (CSA) members or farmers markets that desire diverse weekly produce options<br>- Smaller farms may have higher habitat heterogeneity and bolster birds through landscape complementation (Tschardt et al. 2012, Boesing et al. 2017) |
| Non-native species density | Decrease native species densities and richness, particularly native cavity nesters | - Cavity exclusion (Weitzel 1988, Lindell et al. 2018)<br>- Priority effects whereby resident non-natives can reach cavities before migratory native species (Radunzel et al. 1997)<br>- Behavioral interference (Crozier et al. 2006, Val et al. 2018)<br>- Numerical dominance                                                                                  |

**Table S2.** Models included in paper, response variables, predictor variables, corresponding Figure(s), and corresponding tables.

| <b>Model</b>                                                                              | <b>Response</b>                                         | <b>Predictor variables</b>                                                                                                                             | <b>Figure(s)</b> | <b>Table(s)</b> |
|-------------------------------------------------------------------------------------------|---------------------------------------------------------|--------------------------------------------------------------------------------------------------------------------------------------------------------|------------------|-----------------|
| NMDS<br><br>Primary comparison of interest: Community composition by farming system       | Community composition                                   | 4 groups: Coastal California CS, Coastal California CLS, Pacific Northwest Rainforest CS, Pacific Northwest Rainforest CLS                             | Fig. 2           | N/A             |
| SEM 1<br><br>Primary comparisons of interest: impact of farming system and impact of non- | Native density<br>Native richness<br>Non-native density | Direct effects: Bird Conservation Region, landscape (% natural habitat within 1500 m), farming system (crop system versus crop–livestock system), farm | Fig. 3a          | Table S3        |

|                                                                                                                               |                                                                                                         |                                                                                                                                                                                                                                                                                                                  |                     |          |
|-------------------------------------------------------------------------------------------------------------------------------|---------------------------------------------------------------------------------------------------------|------------------------------------------------------------------------------------------------------------------------------------------------------------------------------------------------------------------------------------------------------------------------------------------------------------------|---------------------|----------|
| native species on native species                                                                                              |                                                                                                         | size, and non-native species impacts on native species                                                                                                                                                                                                                                                           |                     |          |
| SEM 2<br><br>Primary comparisons of interest: impact of livestock presence and impact of non-native species on native species | Native density<br>Native richness<br>Non-native density                                                 | Direct effects: Bird Conservation Region, landscape (% natural habitat within 1500 m), livestock presence at point, farm size, and non-native species impacts on native species                                                                                                                                  | Fig. 3b             | Table S4 |
| SEM 3 (8 model sets)<br><br>Primary comparison of interest: mechanism of impact of farming system                             | Native density<br>Native richness<br>Non-native density                                                 | Direct effects: Bird Conservation Region, landscape (% natural habitat within 1500 m), a series of farm management variables, farm size, and non-native species impacts on native species<br><br>Indirect effects: Farming system indirectly mediates farm management variables which directly impact wild birds | Fig. 4 and Fig. S11 | Table S5 |
| SEM 4<br><br>Primary comparison of interest: ecosystem service and disservice potential by farming system                     | Native insectivore density<br>Native omnivore density<br>Native granivore density<br>Non-native density | Direct effects: Bird Conservation Region, landscape (% natural habitat within 1500 m), farming system (crop system versus crop–livestock system), farm size, and non-native species impacts on native species diet guilds                                                                                        | Fig. 5a             | Table S6 |
| SEM 5<br><br>Primary comparison of interest: ecosystem service and disservice potential by farming system                     | Native insectivore density<br>Native omnivore density<br>Native granivore density<br>Non-native density | Direct effects: Bird Conservation Region, landscape (% natural habitat within 1500 m), livestock presence at point, farm size, and non-native species impacts on native species diet guilds                                                                                                                      | Fig. 5b             | Table S7 |
| SEM 6                                                                                                                         | Native cavity nester density                                                                            | Direct effects: Bird Conservation Region,                                                                                                                                                                                                                                                                        | Fig. S12a           | Table S8 |

|                                                                                                                                            |                                                                  |                                                                                                                                                                                                                   |           |           |
|--------------------------------------------------------------------------------------------------------------------------------------------|------------------------------------------------------------------|-------------------------------------------------------------------------------------------------------------------------------------------------------------------------------------------------------------------|-----------|-----------|
| Primary comparison of interest: non-native cavity nester impacts on native cavity nesters                                                  | Non-native cavity nester density                                 | landscape (% natural habitat within 1500 m), farming system (crop system versus crop–livestock system), farm size, and non-native species impacts on native species                                               |           |           |
| SEM 7<br><br>Primary comparison of interest: non-native cavity nester impacts on native cavity nesters                                     | Native cavity nester density<br>Non-native cavity nester density | Direct effects: Bird Conservation Region, landscape (% natural habitat within 1500 m), livestock presence at point, farm size, and non-native species impacts on native species                                   | Fig. S12b | Table S9  |
| SEM 8<br><br>Primary comparisons of interest: impact of farming system, landscape context, and non-native species on species of concern    | Species of concern density<br>Non-native density                 | Direct effects: Bird Conservation Region, landscape (% natural habitat within 1500 m), farming system (crop system versus crop–livestock system), farm size, and non-native species impacts on species of concern | Fig. S13a | Table S10 |
| SEM 9<br><br>Primary comparison of interest: impact of livestock presence, landscape context, and non-native species on species of concern | Species of concern density<br>Non-native density                 | Direct effects: Bird Conservation Region, landscape (% natural habitat within 1500 m), livestock presence at point, farm size, and non-native species impacts on species of concern                               | Fig. S13b | Table S11 |

**Table S3.** Estimates from structural equation model depicted in Fig. 3a modeling non-native density, native density, and native richness as a function of farm size, % natural habitat in the landscape, on farm livestock, and Bird Conservation Region. Crop system and Coastal California are the reference groups for livestock and Bird Conservation Region, respectively. Global model *Fisher's C* = 1.21, *P* = 0.55. Non-native bird density model marginal pseudo  $R_2 = 0.25$  and conditional pseudo  $R_2 = 0.59$ . Native bird density marginal pseudo  $R_2 = 0.25$  and conditional pseudo  $R_2 = 0.56$ . Native bird richness marginal pseudo  $R_2 = 0.39$  and conditional pseudo  $R_2 = 0.50$ .

| Response           | Predictor                | Estimate | Standard Error | P value    |
|--------------------|--------------------------|----------|----------------|------------|
| Non-native density | Farm size                | -1.1173  | 0.1841         | <0.0001*** |
| Non-native density | % Natural land           | -0.8636  | 0.1571         | <0.0001*** |
| Non-native density | Livestock                | 1.288    | 0.3101         | <0.0001*** |
| Native density     | BCR                      | 0.0425   | 0.1003         | 0.6715     |
| Native density     | Farm size                | -0.2748  | 0.0504         | <0.0001*** |
| Native density     | % Natural land           | 0.2105   | 0.0731         | 0.004**    |
| Native density     | Livestock                | 0.1682   | 0.0909         | 0.0644     |
| Native density     | Non-native density       | 0.0101   | 0.004          | 0.0109*    |
| Native density     | % Natural land*Livestock | -0.2182  | 0.0906         | 0.016*     |
| Native richness    | BCR                      | -0.1454  | 0.0599         | 0.0152*    |
| Native richness    | Farm size                | -0.2878  | 0.0346         | <0.0001*** |
| Native richness    | % Natural land           | 0.2095   | 0.0428         | <0.0001*** |
| Native richness    | Livestock                | 0.2565   | 0.0543         | <0.0001*** |
| Native richness    | Non-native density       | -0.0005  | 0.0026         | 0.8443     |
| Native richness    | Native density           | 0.0153   | 0.0013         | <0.0001*** |
| Native richness    | % Natural land*Livestock | -0.1343  | 0.0533         | 0.0118*    |

**Table S4.** Estimates from structural equation model depicted in Fig. 3b modeling non-native density, native density, and native richness as a function of farm size, % natural habitat in the landscape, livestock presence in a point, and Bird Conservation Region. Livestock absence from a point and Coastal California are the reference groups for livestock and Bird Conservation Region, respectively. Global model *Fisher's C* = 0.60, *P* = 0.74. Non-native bird density model marginal pseudo  $R_2 = 0.24$  and conditional pseudo  $R_2 = 0.57$ . Native bird density marginal pseudo  $R_2 = 0.24$  and conditional pseudo  $R_2 = 0.56$ . Native bird richness marginal pseudo  $R_2 = 0.369$  and conditional pseudo  $R_2 = 0.50$ .

| Response           | Predictor          | Estimate | Standard Error | P value    |
|--------------------|--------------------|----------|----------------|------------|
| Non-native density | Farm size          | -1.0487  | 0.1759         | <0.0001*** |
| Non-native density | % Natural land     | -0.6496  | 0.1396         | <0.0001*** |
| Non-native density | Livestock at point | 1.259    | 0.2473         | <0.0001*** |
| Native density     | BCR                | 0.0395   | 0.1006         | 0.6948     |
| Native density     | Farm size          | -0.2934  | 0.0495         | <0.0001*** |



|                 |                                   |         |        |            |
|-----------------|-----------------------------------|---------|--------|------------|
| Native density  | % Natural land                    | 0.1691  | 0.055  | 0.0021**   |
| Native density  | Livestock at point                | 0.1606  | 0.0802 | 0.0452*    |
| Native density  | Non-native density                | 0.010   | 0.004  | 0.0123*    |
| Native density  | % Natural land*Livestock at point | -0.1928 | 0.0711 | 0.0067**   |
| Native richness | BCR                               | -0.1313 | 0.0623 | 0.035*     |
| Native richness | Farm size                         | -0.3247 | 0.0356 | <0.0001*** |
| Native richness | % Natural land                    | 0.2029  | 0.0336 | <0.0001*** |
| Native richness | Livestock at point                | 0.0461  | 0.0522 | 0.3768     |
| Native richness | Non-native density                | 0.0009  | 0.0027 | 0.7411     |
| Native richness | Native density                    | 0.0152  | 0.0014 | <0.0001*** |
| Native richness | % Natural land*Livestock at point | -0.1058 | 0.0439 | 0.0159*    |

**Table S5.** CIC comparison of models substituting farm management variables correlated with livestock integration. We evaluated a model combining the top two models (CLS only and structures/ha) which had a  $\Delta$ CIC of 14.4, so we did not further evaluate ways to improve indirect effects models.

| Model          | CIC   | $\Delta$ CIC | Fisher's C | D-sep <i>P</i> value | Significant missing links <sub>a</sub>                                                                                                                         |
|----------------|-------|--------------|------------|----------------------|----------------------------------------------------------------------------------------------------------------------------------------------------------------|
| CLS only       | 51.2  | 0            | 1.21       | 0.55                 |                                                                                                                                                                |
| Structures/ha  | 131.4 | 80.2         | 79.4       | <0.0001              | Non-native density ~ Livestock<br>Native richness ~ Livestock<br>Structures/ha ~ Farm size                                                                     |
| % Woody crops  | 187.6 | 136.4        | 135.6      | <0.0001              | Non-native density ~ Livestock<br>Native richness ~ Livestock<br>% Woody crops ~ Farm size<br>% Woody crops ~ % natural in landscape<br>% Woody crops ~ BCR    |
| % Pasture/hay  | 292.7 | 241.5        | 240.7      | <0.0001              | Non-native density ~ Livestock<br>Native density ~ Livestock<br>Native richness ~ Livestock<br>% Pasture/hay ~ % natural in landscape<br>% Pasture/hay ~ BCR   |
| Patch richness | 360.8 | 309.6        | 308.8      | <0.0001              | Non-native density ~ Livestock<br>Native richness ~ Livestock<br>Patch richness ~ Farm size<br>Patch richness ~ % natural in landscape<br>Patch richness ~ BCR |
| % Row crops    | 423.7 | 372.5        | 371.6      | <0.0001              | Non-native density ~ Livestock                                                                                                                                 |

|            |        |        |        |          |                                                                                                                                                    |
|------------|--------|--------|--------|----------|----------------------------------------------------------------------------------------------------------------------------------------------------|
|            |        |        |        |          | Native richness ~ Livestock<br>% Row crop ~ Farm size<br>% Row crop ~ % natural in landscape<br>% Row crop ~ BCR                                   |
| Field size | 1474.0 | 1422.8 | 1422.0 | < 0.0001 | Non-native density ~ Livestock<br>Native richness ~ Livestock<br>Field size ~ Farm size<br>Field size ~ % natural in landscape<br>Field size ~ BCR |

<sup>a</sup>  $P < 0.05$

**Table S6.** Estimates from structural equation model depicted in Fig. 5a modeling non-native density diet guild density as a function of farm size, % natural habitat in the landscape, on farm livestock, and Bird Conservation Region. Crop system and Coastal California are the reference groups for livestock and Bird Conservation Region, respectively. Global *Fisher's C* = 15.2,  $P = 0.23$ . Non-native bird density marginal pseudo  $R^2 = 0.25$  and conditional pseudo  $R^2 = 0.59$ . Native granivore density marginal pseudo  $R^2 = 0.19$  and conditional pseudo  $R^2 = 0.51$ . Native insectivore density marginal pseudo  $R^2 = 0.15$  and conditional pseudo  $R^2 = 0.46$ . Native omnivore density marginal pseudo  $R^2 = 0.13$  and conditional pseudo  $R^2 = 0.41$ .

| Response            | Predictor          | Estimate | Standard Error | P value    |
|---------------------|--------------------|----------|----------------|------------|
| Non-native density  | Farm size          | -1.1173  | 0.1841         | <0.0001*** |
| Non-native density  | % Natural land     | -0.8636  | 0.1571         | <0.0001*** |
| Non-native density  | Livestock          | 1.288    | 0.3101         | <0.0001*** |
| Omnivore density    | Farm size          | -0.2756  | 0.0697         | 0.0001***  |
| Omnivore density    | % Natural land     | 0.2751   | 0.0655         | <0.0001*** |
| Omnivore density    | Livestock          | -0.0458  | 0.1338         | 0.7324     |
| Omnivore density    | Non-native density | 0.0085   | 0.0064         | 0.1815     |
| Granivore density   | BCR                | -0.8111  | 0.2005         | 0.0001***  |
| Granivore density   | Farm size          | -0.7923  | 0.1086         | <0.0001*** |
| Granivore density   | % Natural land     | -0.1062  | 0.096          | 0.2688     |
| Granivore density   | Livestock          | 0.0655   | 0.1824         | 0.7193     |
| Granivore density   | Non-native density | 0.0266   | 0.0073         | 0.0003***  |
| Insectivore density | Farm size          | -0.2597  | 0.0584         | <0.0001*** |
| Insectivore density | % Natural land     | 0.085    | 0.0567         | 0.1338     |
| Insectivore density | Livestock          | 0.2594   | 0.1145         | 0.0234*    |
| Insectivore density | Non-native density | 0.0031   | 0.0054         | 0.5647     |

**Table S7.** Estimates from structural equation model depicted in Fig. 5b modeling non-native density diet guild density as a function of farm size, % natural habitat in the landscape, livestock presence in a point, and Bird Conservation Region. Livestock absence from a point and Coastal California are the reference groups for livestock and Bird Conservation Region, respectively. Global *Fisher's C* = 14.6, *P* = 0.26. Non-native bird density marginal pseudo  $R_2 = 0.24$  and conditional pseudo  $R_2 = 0.57$ . Native granivore density marginal pseudo  $R_2 = 0.19$  and conditional pseudo  $R_2 = 0.51$ . Native insectivore density marginal pseudo  $R_2 = 0.14$  and conditional pseudo  $R_2 = 0.45$ . Native omnivore density marginal pseudo  $R_2 = 0.13$  and conditional pseudo  $R_2 = 0.42$ .

| Response            | Predictor          | Estimate | Standard Error | P value    |
|---------------------|--------------------|----------|----------------|------------|
| Non-native density  | Farm size          | -1.0487  | 0.1759         | <0.0001*** |
| Non-native density  | % Natural land     | -0.6496  | 0.1396         | <0.0001*** |
| Non-native density  | Livestock at point | 1.259    | 0.2473         | <0.0001*** |
| Omnivore density    | Farm size          | -0.2651  | 0.0694         | 0.0001***  |
| Omnivore density    | % Natural land     | 0.2533   | 0.0618         | <0.0001*** |
| Omnivore density    | Livestock at point | 0.1255   | 0.1174         | 0.2853     |
| Omnivore density    | Non-native density | 0.0069   | 0.0065         | 0.284      |
| Granivore density   | BCR                | -0.7897  | 0.2            | 0.0001***  |
| Granivore density   | Farm size          | -0.7854  | 0.1084         | <0.0001*** |
| Granivore density   | % Natural land     | -0.116   | 0.0938         | 0.2163     |
| Granivore density   | Livestock at point | 0.1022   | 0.1539         | 0.5066     |
| Granivore density   | Non-native density | 0.026    | 0.0073         | 0.0004***  |
| Insectivore density | Farm size          | -0.2804  | 0.0583         | <0.0001*** |
| Insectivore density | % Natural land     | 0.1394   | 0.0532         | 0.0088**   |
| Insectivore density | Livestock at point | 0.0545   | 0.1018         | 0.5929     |
| Insectivore density | Non-native density | 0.0042   | 0.0055         | 0.4441     |

**Table S8.** Estimates from structural equation model depicted in Fig. S12a modeling native and non-native cavity nester densities as a function of farm size, % natural habitat in the landscape, on farm livestock, and Bird Conservation Region (BCR). Crop system and Coastal California are the reference groups for livestock and Bird Conservation Region, respectively. Global *Fisher's C* = 0.56, *P* = 0.76. Non-native cavity nester density marginal pseudo  $R_2 = 0.22$  and conditional pseudo  $R_2 = 0.56$ , and native cavity nester density marginal pseudo  $R_2 = 0.22$  and conditional pseudo  $R_2 = 0.45$ .

| Response                         | Predictor      | Estimate | Standard Error | P value    |
|----------------------------------|----------------|----------|----------------|------------|
| Non-native cavity nester density | Farm size      | -1.03    | 0.19           | <0.0001*** |
| Non-native cavity nester density | % Natural land | -0.75    | 0.16           | <0.0001*** |

|                                  |                    |       |       |            |
|----------------------------------|--------------------|-------|-------|------------|
| Non-native cavity nester density | Livestock          | 1.31  | 0.32  | <0.0001*** |
| Native cavity nester density     | Farm size          | -0.32 | 0.12  | 0.008 **   |
| Native cavity nester density     | % Natural land     | 0.38  | 0.098 | 0.0001***  |
| Native cavity nester density     | Livestock          | 1.08  | 0.19  | <0.0001*** |
| Native cavity nester density     | Non-native density | 0.013 | 0.008 | 0.099      |
| Native cavity nester density     | BCR                | -0.24 | 0.21  | 0.26       |

**Table S9.** Estimates from structural equation model depicted in Fig. S12b modeling native and non-native cavity nester densities as a function of farm size, % natural habitat in the landscape, livestock presence within a point, and Bird Conservation Region. No livestock and Coastal California are the reference groups for livestock and Bird Conservation Region, respectively. Global *Fisher's C* = 0.004, *P* = 0.99. Non-native cavity nester density marginal pseudo  $R^2$  = 0.21 and conditional pseudo  $R^2$  = 0.54, and native cavity nester density marginal pseudo  $R^2$  = 0.17 and conditional pseudo  $R^2$  = 0.46.

| <b>Response</b>                  | <b>Predictor</b>   | <b>Estimate</b> | <b>Standard Error</b> | <b>P value</b> |
|----------------------------------|--------------------|-----------------|-----------------------|----------------|
| Non-native cavity nester density | Farm size          | -0.97           | 0.18                  | <0.0001***     |
| Non-native cavity nester density | % Natural land     | -0.54           | 0.14                  | 0.0002***      |
| Non-native cavity nester density | Livestock at point | 1.29            | 0.26                  | <0.0001***     |
| Native cavity nester density     | Farm size          | -0.46           | 0.13                  | 0.0003***      |
| Native cavity nester density     | % Natural land     | 0.51            | 0.10                  | <0.0001***     |
| Native cavity nester density     | Livestock at point | -0.003          | 0.16                  | 0.99           |
| Native cavity nester density     | Non-native density | 0.018           | 0.008                 | 0.027*         |
| Native cavity nester density     | BCR                | -0.098          | 0.23                  | 0.66           |

**Table S10.** Estimates from structural equation model depicted in Fig. S13a modeling species of concern and non-native densities as a function of farm size, % natural habitat in the landscape, livestock on farm, and Bird Conservation Region. Crop system and Coastal California are the reference groups for livestock and Bird Conservation Region, respectively. Global *Fisher's C* = 1.21, *P* = 0.55. Non-native density marginal pseudo *R*<sub>2</sub> = 0.25 and conditional pseudo *R*<sub>2</sub> = 0.59, and species of concern density marginal pseudo *R*<sub>2</sub> = 0.08 and conditional pseudo *R*<sub>2</sub> = 0.35.

| Response                   | Predictor           | Estimate | Standard Error | P value     |
|----------------------------|---------------------|----------|----------------|-------------|
| Non-native density         | Farm size           | -1.12    | 0.18           | < 0.0001*** |
| Non-native density         | % Natural land      | -0.86    | 0.16           | <0.0001***  |
| Non-native density         | Livestock           | 1.29     | 0.31           | <0.0001***  |
| Species of concern density | Farm size           | -0.042   | 0.090          | 0.64        |
| Species of concern density | % Natural land      | 0.41     | 0.13           | 0.002**     |
| Species of concern density | Livestock           | 0.48     | 0.16           | 0.003**     |
| Species of concern density | Non-native density  | -0.005   | 0.009          | 0.59        |
| Species of concern density | BCR                 | -0.15    | 0.18           | 0.39        |
| Species of concern density | % Natural*Livestock | -0.37    | 0.16           | 0.023*      |

**Table S11.** Estimates from structural equation model depicted in Fig. S13b modeling species of concern and non-native densities as a function of farm size, % natural habitat in the landscape, livestock presence within a point, and Bird Conservation Region. No livestock and Coastal California are the reference groups for livestock and Bird Conservation Region, respectively. Global *Fisher's C* = 0.44, *P* = 0.80. Non-native density marginal pseudo *R*<sub>2</sub> = 0.25 and conditional pseudo *R*<sub>2</sub> = 0.57, and species of concern density marginal pseudo *R*<sub>2</sub> = 0.05 and conditional pseudo *R*<sub>2</sub> = 0.34.

| Response                   | Predictor                    | Estimate | Standard Error | P value     |
|----------------------------|------------------------------|----------|----------------|-------------|
| Non-native density         | Farm size                    | -1.07    | 0.18           | < 0.0001*** |
| Non-native density         | % Natural land               | -0.68    | 0.14           | <0.0001***  |
| Non-native density         | Livestock at point           | 1.26     | 0.25           | <0.0001***  |
| Species of concern density | Farm size                    | -0.11    | 0.09           | 0.23        |
| Species of concern density | % Natural land               | 0.36     | 0.10           | 0.0003***   |
| Species of concern density | Livestock at point           | 0.17     | 0.15           | 0.26        |
| Species of concern density | Non-native density           | -0.004   | 0.009          | 0.71        |
| Species of concern density | BCR                          | -0.15    | 0.18           | 0.41        |
| Species of concern density | % Natural*Livestock at point | -0.29    | 0.13           | 0.031*      |

## SI REFERENCES

- Batáry, P., T. Matthiesen, and T. Tschardtke. 2010. Landscape-moderated importance of hedges in conserving farmland bird diversity of organic vs. conventional croplands and grasslands. *Biological Conservation* 143:2020–2027.
- Benton, T. G., J. A. Vickery, and J. D. Wilson. 2003. Farmland biodiversity: Is habitat heterogeneity the key? *Trends in Ecology and Evolution* 18:182–188.
- Boesing, A. L., E. Nichols, and J. P. Metzger. 2017. Effects of landscape structure on avian-mediated insect pest control services: a review. *Landscape Ecology* 32:931–944.
- Carlson, J. C., D. R. Hyatt, J. W. Ellis, D. R. Pipkin, A. M. Mangan, M. Russell, D. S. Bolte, R. M. Engeman, T. J. Deliberto, and G. M. Linz. 2015. Mechanisms of antimicrobial resistant *Salmonella enterica* transmission associated with starling – livestock interactions. *Veterinary Microbiology* 179:60–68.
- Crozier, A. M. L., M. E. Seamans, R. J. Gutiérrez, J. Peter, and R. B. Horn. 2006. Does the presence of barred owls suppress the calling behavior of spotted owls? *The Condor* 108:760–769.
- Dross, C., K. Princé, F. Jiguet, and M. Tichit. 2018. Contrasting bird communities along production gradients of crops and livestock in French farmlands. *Agriculture, Ecosystems and Environment* 253:55–61.
- Evans, D. M., S. M. Redpath, S. A. Evans, D. A. Elston, C. J. Gardner, P. Dennis, and R. J. Pakeman. 2006. Low intensity, mixed livestock grazing improves the breeding abundance of a common insectivorous passerine. *Biology Letters*:636–638.
- Fahrig, L., J. Girard, D. Duro, J. Pasher, A. Smith, S. Javorek, D. King, K. F. Lindsay, S. Mitchell, and L. Tischendorf. 2015. Farmlands with smaller crop fields have higher within-field biodiversity. *Agriculture, Ecosystems and Environment* 200:219–234.
- Frei, B., D. Renard, M. G. E. Mitchell, V. Seufert, R. C. Jeanine, and M. R. Elena. 2018. Bright spots in agricultural landscapes: Identifying areas exceeding expectations for multifunctionality and biodiversity. *Journal of Applied Ecology* 55:2731–2743.
- Geiger, F., G. R. De Snoo, F. Berendse, I. Guerrero, M. B. Morales, J. O. Juan, S. Eggers, T. Pärt, R. Bommarco, J. Bengtsson, L. W. Clement, W. W. Weisser, A. Olszewski, P. Ceryngier, V. Hawro, P. Inchausti, C. Fischer, and A. Flohre. 2010. Landscape composition influences farm management effects on farmland birds in winter: A pan-European approach. *Agriculture, Ecosystems and Environment* 139:571–577.
- Gove, A. D., K. Hylander, S. Nemomissa, A. Shimelis, W. Enkossa, A. D. Gove, and E. T. Al. 2013. Structurally complex farms support high avian functional diversity in tropical montane Ethiopia. *Journal of Tropical Ecology* 29:87–97.
- Hald, B., M. N. Skov, E. M. Nielsen, C. Rahbek, J. J. Madsen, M. Wainø, M. Chriél, S. Nordentoft, D. L. Baggesen, and M. Madsen. 2016. *Campylobacter jejuni* and *Campylobacter coli* in wild birds on Danish livestock farms. *Acta Veterinaria Scandinavica* 58:1–10.

- Haslem, A., and A. F. Bennett. 2008. Countryside elements and the conservation of birds in agricultural environments. *Agriculture, Ecosystems & Environment* 125:191–203.
- Hiron, M., Å. Berg, S. Eggers, J. Josefsson, and T. Pärt. 2013. Bird diversity relates to agri-environment schemes at local and landscape level in intensive farmland. *Agriculture, Ecosystems and Environment* 176:9–16.
- Kennedy, C. M., and P. P. Marra. 2010. Matrix mediates avian movements in tropical forested landscapes: Inference from experimental translocations. *Biological Conservation* 143:2136–2145.
- Kennedy, C. M., P. P. Marra, W. F. Fagan, and M. C. Neel. 2010. Landscape matrix and species traits mediate responses of Neotropical resident birds to forest fragmentation in Jamaica. *Ecological Monographs* 80:651–669.
- Kennedy, C. M., E. F. Zipkin, and P. P. Marra. 2017. Differential matrix use by Neotropical birds based on species traits and landscape condition: *Ecological Applications* 27:619–631.
- Lindell, C., R. A. Eaton, P. H. Howard, S. M. Roels, and M. E. Shave. 2018. Enhancing agricultural landscapes to increase crop pest reduction by vertebrates. *Agriculture, Ecosystems and Environment* 257:1–11.
- Otieno, N. E., N. Gichuki, N. Farwig, and S. Kiboi. 2011. The role of farm structure on bird assemblages around a Kenyan tropical rainforest. *African Journal of Ecology* 49:410–417.
- Petit, L. J., and D. R. Petit. 2003. Evaluating the importance of human-modified lands for neotropical bird conservation. *Conservation Biology* 17:687–694.
- Radunzel, L. A., D. M. Muschitz, V. M. Bauldry, and P. Arcese. 1997. A long-term study of the breeding success of eastern bluebirds by year and cavity type. *Journal of Field Ornithology* 68:7–18.
- Šálek, M., M. Bažant, and M. Zmihorski. 2017. Active farmsteads are year-round strongholds for farmland birds. *Journal of Applied Ecology* 55:1908–1918.
- Sauer, J., J. Fallon, and R. Johnson. 2003. Use of North American Breeding Bird Survey Data to Estimate Population Change for Bird Conservation Regions. *The Journal of Wildlife Management* 67:372–389.
- Somers, C. M., and R. D. Morris. 2002. Birds and wine grapes: Foraging activity causes small-scale damage patterns in single vineyards. *Journal of Applied Ecology* 39:511–523.
- Tscharntke, T., J. M. Tylianakis, T. A. Rand, R. K. Didham, L. Fahrig, P. Batáry, J. Bengtsson, Y. Clough, T. O. Crist, C. F. Dormann, R. M. Ewers, J. Fründ, R. D. Holt, A. Holzschuh, A. M. Klein, D. Kleijn, C. Kremen, D. A. Landis, W. Laurance, D. Lindenmayer, C. Scherber, N. Sodhi, I. Steffan-Dewenter, C. Thies, W. H. van der Putten, and C. Westphal. 2012. Landscape moderation of biodiversity patterns and processes - eight hypotheses.
- Tuck, S. L., C. Winqvist, F. Mota, J. Ahnström, L. A. Turnbull, and J. Bengtsson. 2014. Land-use intensity and the effects of organic farming on biodiversity: A hierarchical meta-analysis. *Journal of Applied Ecology* 51:746–755.

- Val, J., D. J. Eldridge, S. K. Travers, and I. Oliver. 2018. Livestock grazing reinforces the competitive exclusion of bodied birds by large aggressive birds. *Journal of Applied Ecology* 55:1919–1929.
- Weitzel, N. H. 1988. Nest-site competition between the european starling and native breeding birds in Northwestern Nevada. *The Condor* 90:515–517.
- Yan, L., and D. P. Roy. 2016. Remote sensing of environment conterminous United States crop field size quantification from multi-temporal Landsat data. *Remote Sensing and Environment* 172:67–86.



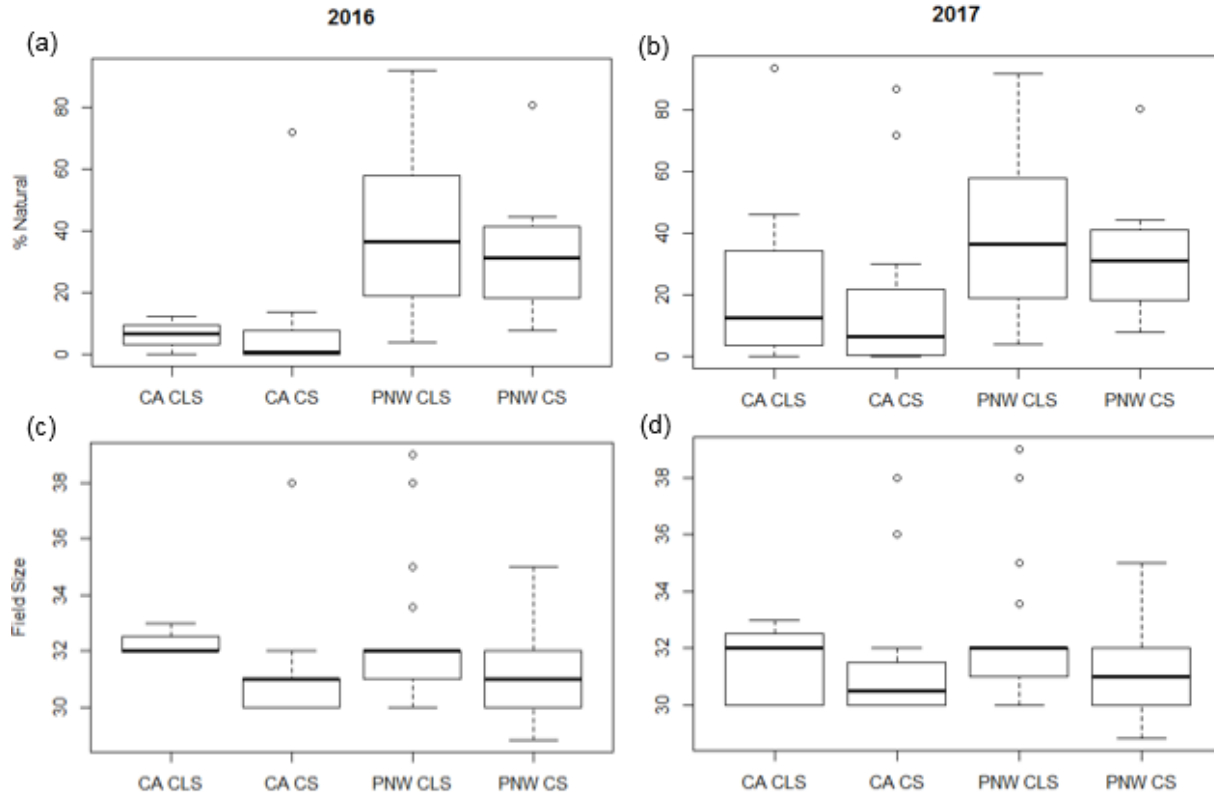

**Fig. S1.** Boxplots showing range of (a-b) natural habitat calculated from the National Land Cover Database and (c-d) average crop field size in the landscape calculated from the IIASA-IFPRI global field size map (Yan and Roy 2016) in a 1500 m radius from farm center by farming system (CS = crop system, CLS = crop–livestock system) and Bird Conservation Bird Conservation Region (CA = Coastal California, PNW = Pacific Northwest Rainforest) for farms surveyed in 2016 (top) and 2017 (bottom).

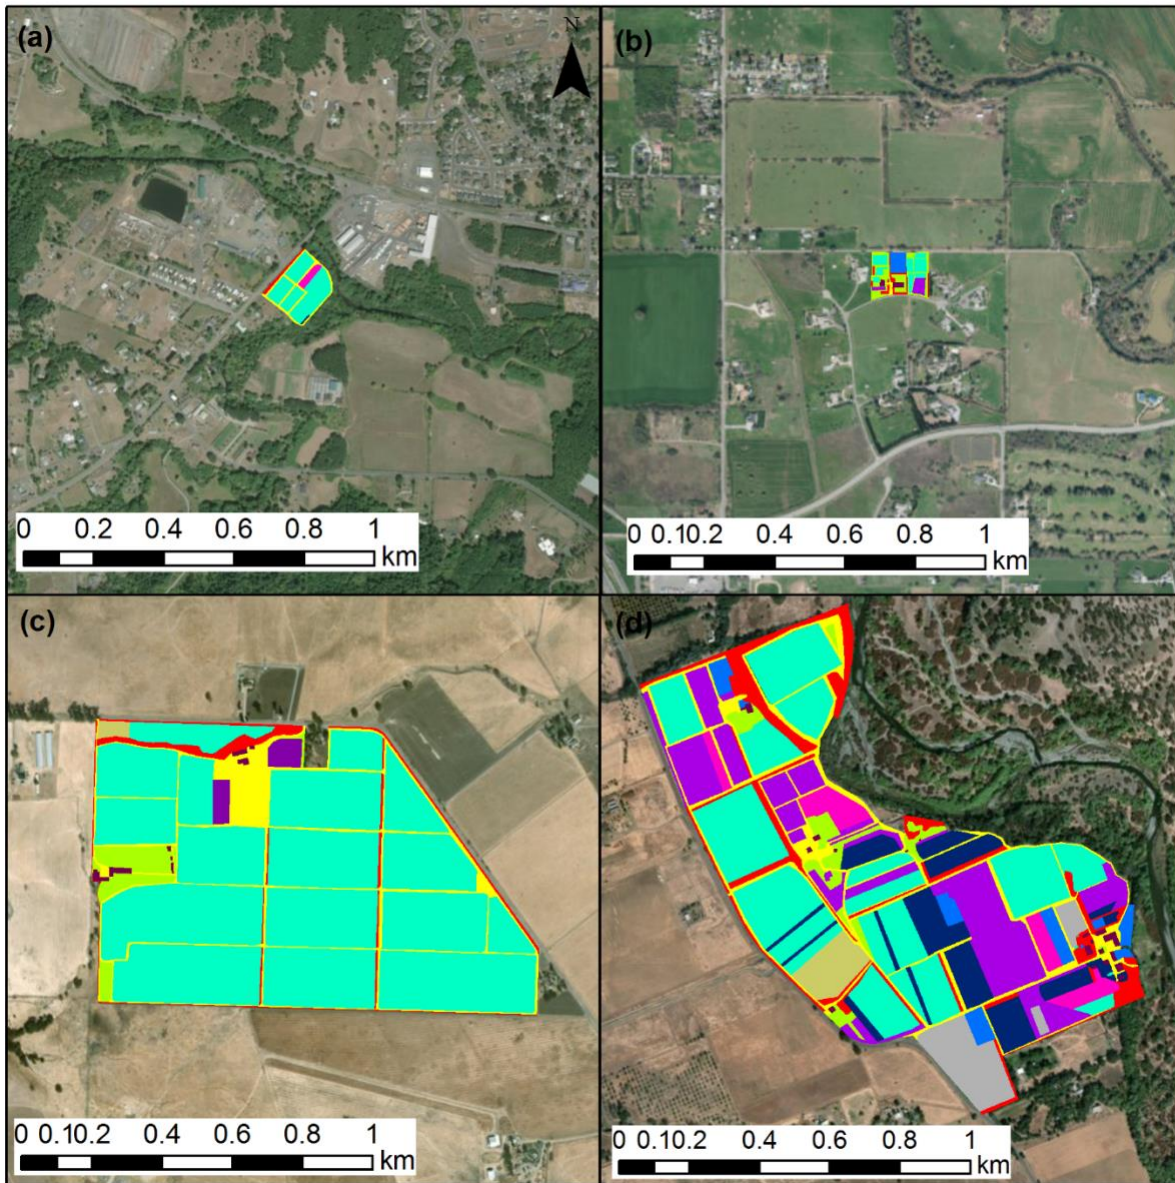

**Fig. S2.** Maps comparing habitat diversity and size of an (a) small, crop system, (b) small, crop–livestock system, (c) large, crop system, and (d) large, crop–livestock system. Color coding and scale are consistent throughout panels for comparison. Color coding: red hedge or woody ditch, purple woody crop, yellow road, lime green mowed grass, brown structure, blue livestock, gray orchard with livestock, olive pasture/hay, pink cover crop, dark navy flowers.

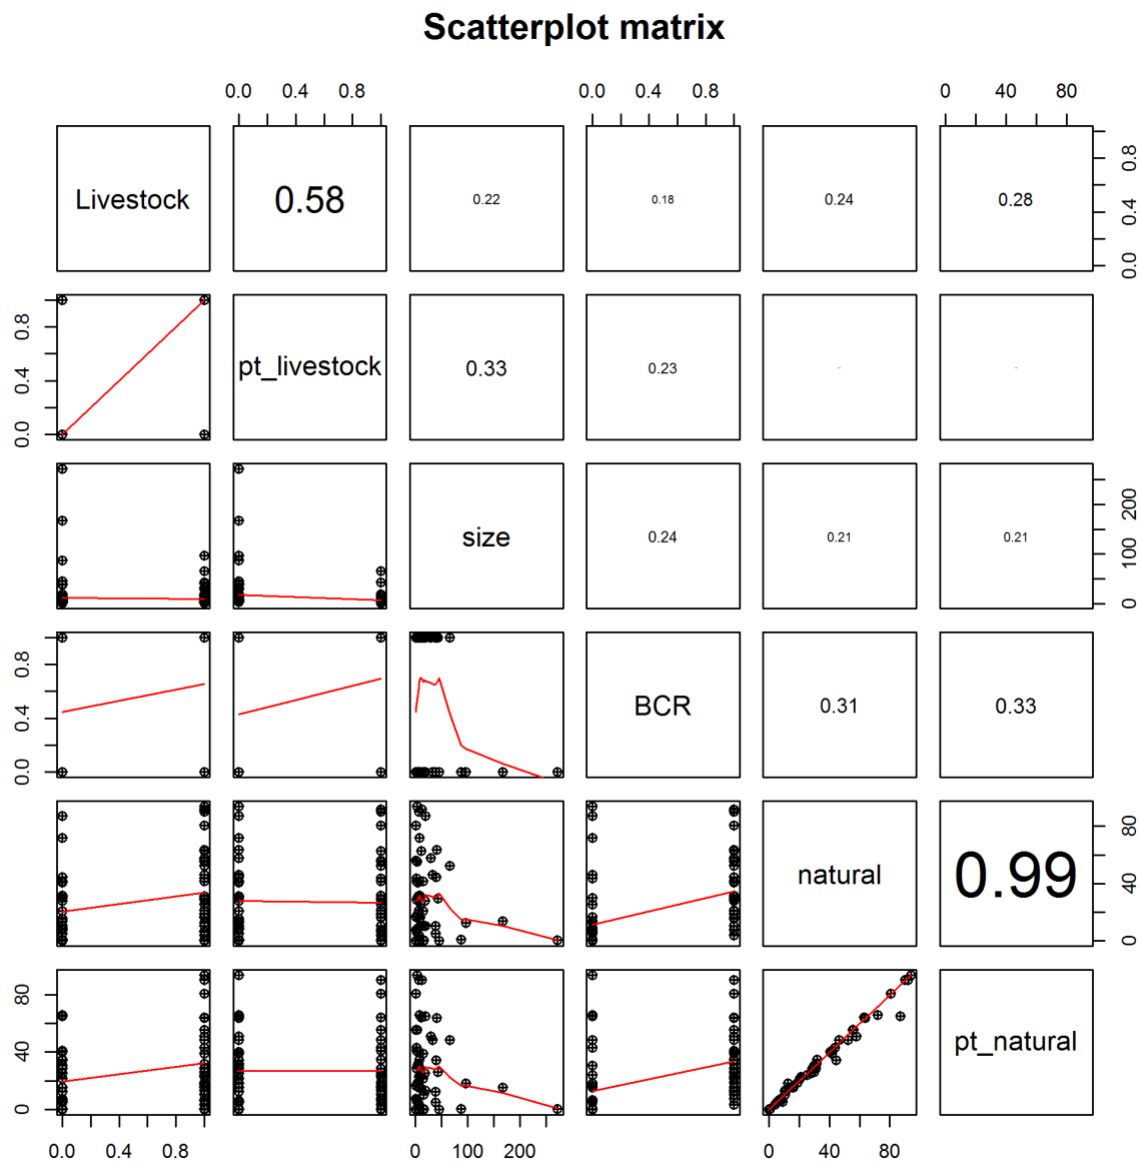

**Fig. S3.** Pairwise scatterplot showing Pearson's  $R^2$  correlations between variables in structural equation models including livestock presence/absence on farm, farm in a survey point, farm size (ha), Bird Conservation Bird Conservation Region, % natural/semi-natural habitat in the landscape (1500 m) from the farm center, and % natural habitat in the landscape from each point center.

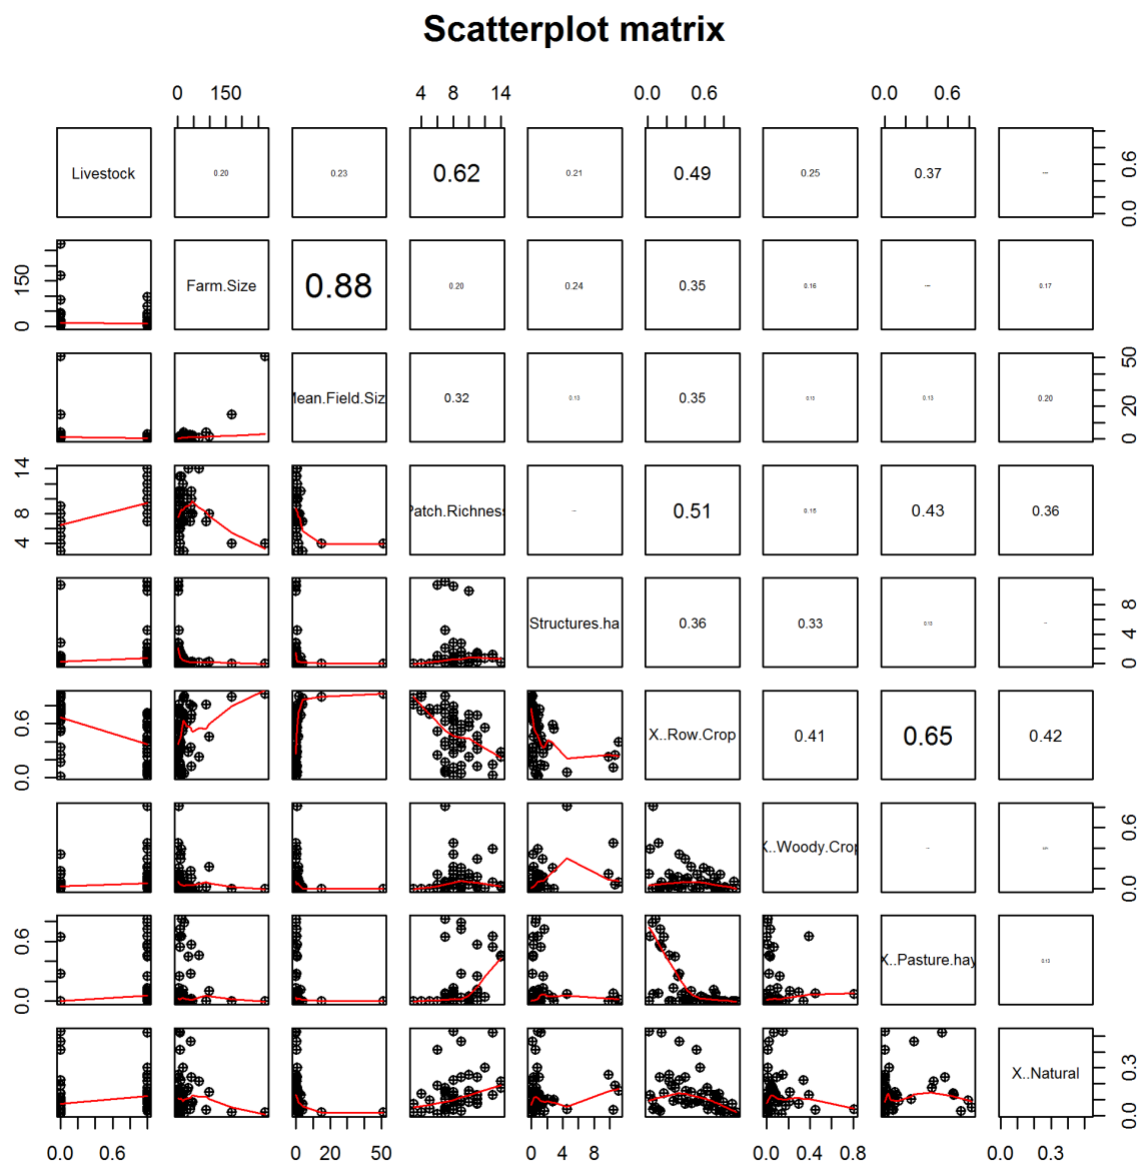

**Fig. S4.** Pairwise scatterplot showing Pearson's  $R^2$  correlations between on farm variables livestock presence/absence on farm, farm size, farm mean crop field size, farm patch richness, structures/ha on farm, farm % row crop, farm % woody crop, farm % pasture/hay, and on-farm % natural/semi-natural habitat.

## Scatterplot matrix

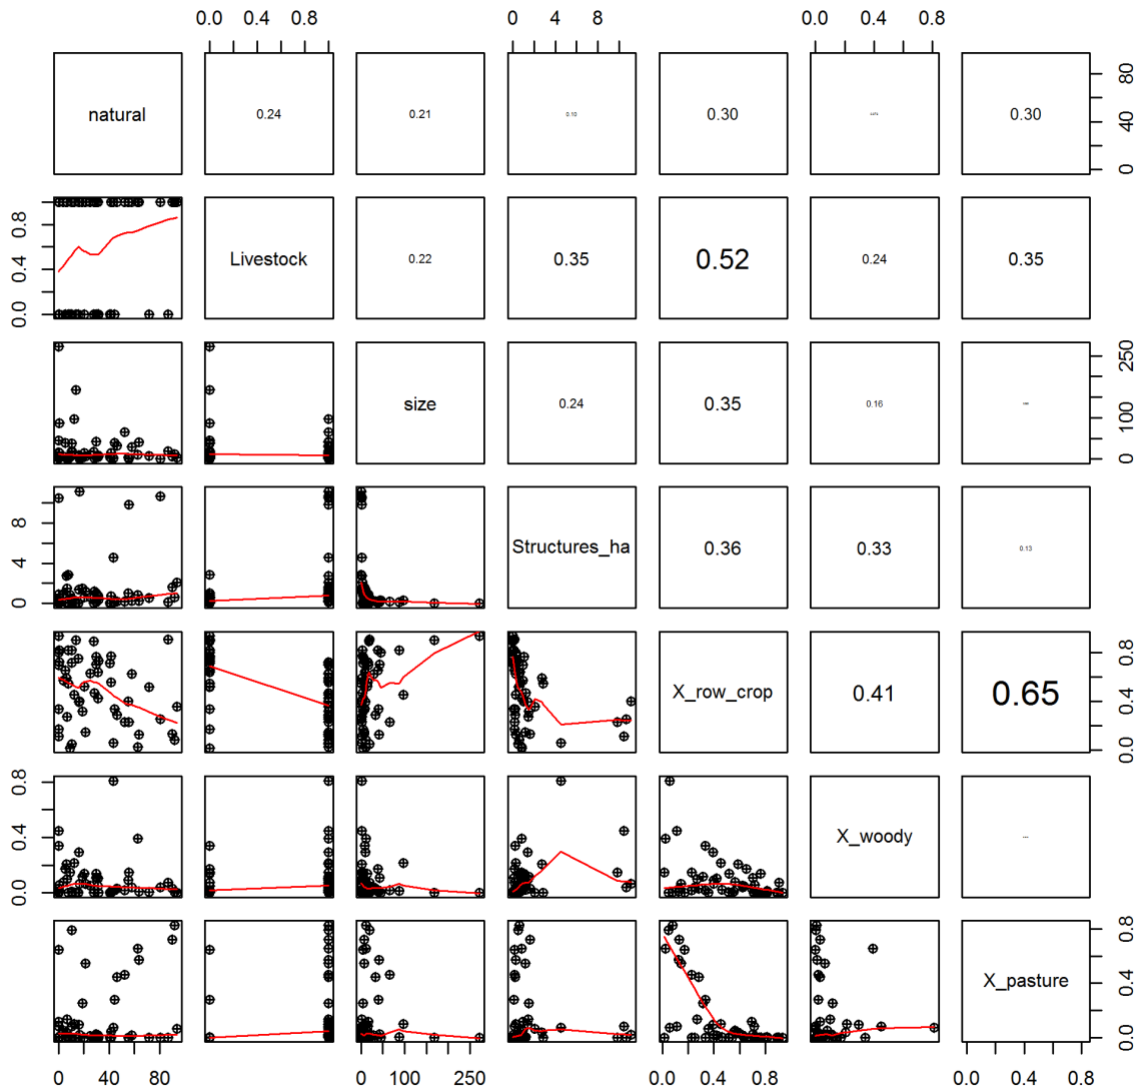

**Fig. S5.** Pairwise scatterplot showing Pearson's  $R^2$  correlations between on variables used in SEM to test mechanistic hypotheses described in Table S4: % natural in the landscape (1500 m), farm livestock presence/absence, farm size, structures/ha, % row crop on farm, % woody crop on farm, and % pasture/hay on farm.

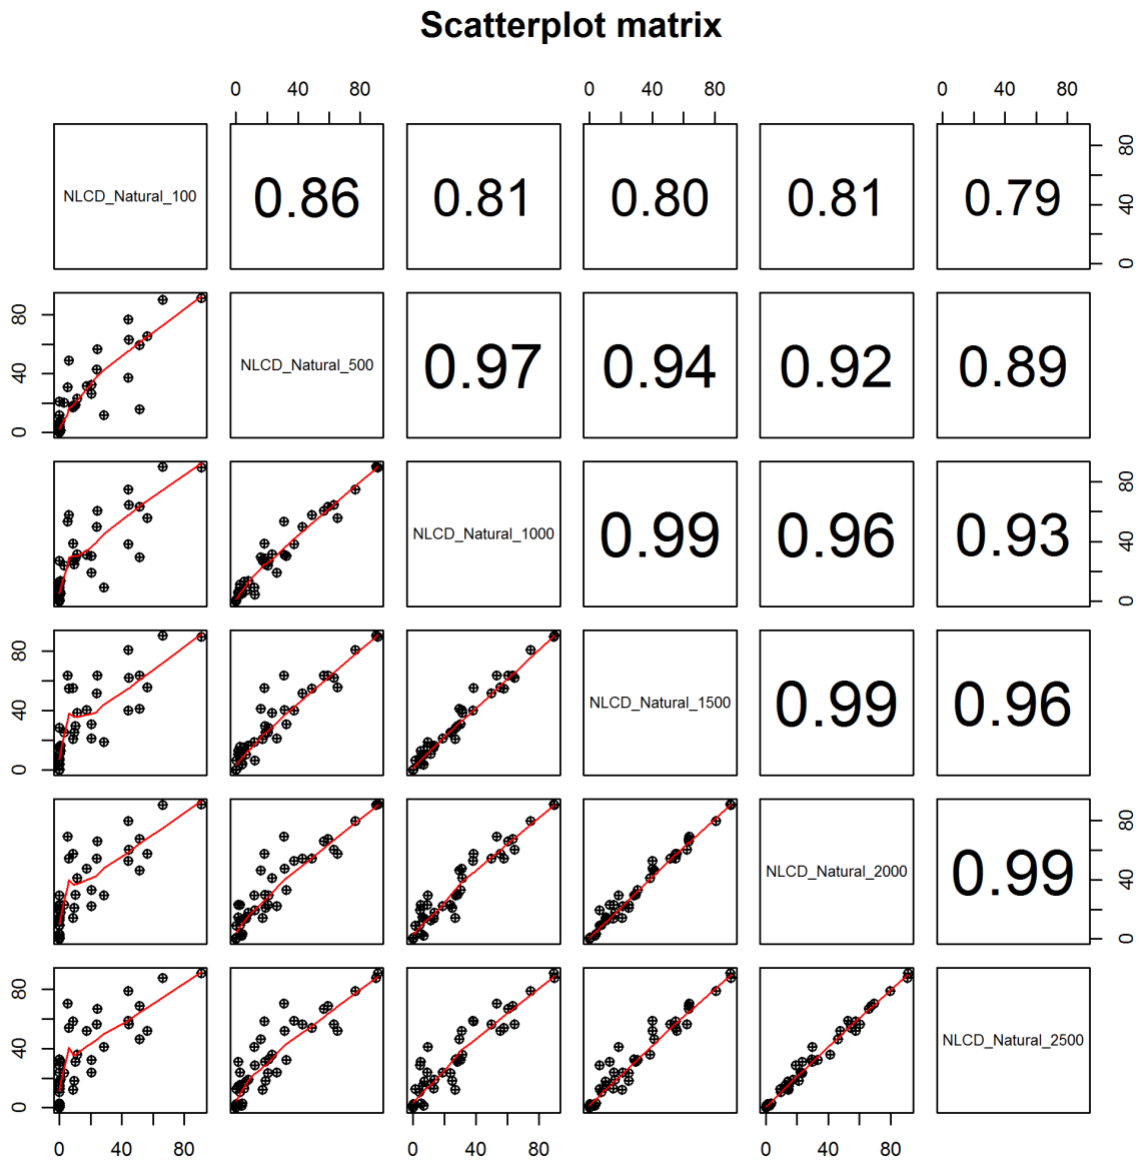

**Fig. S6.** Pairwise scatterplot showing Pearson's  $R^2$  correlations between percentage natural habitat in the landscape from 100 m to 2500 m.

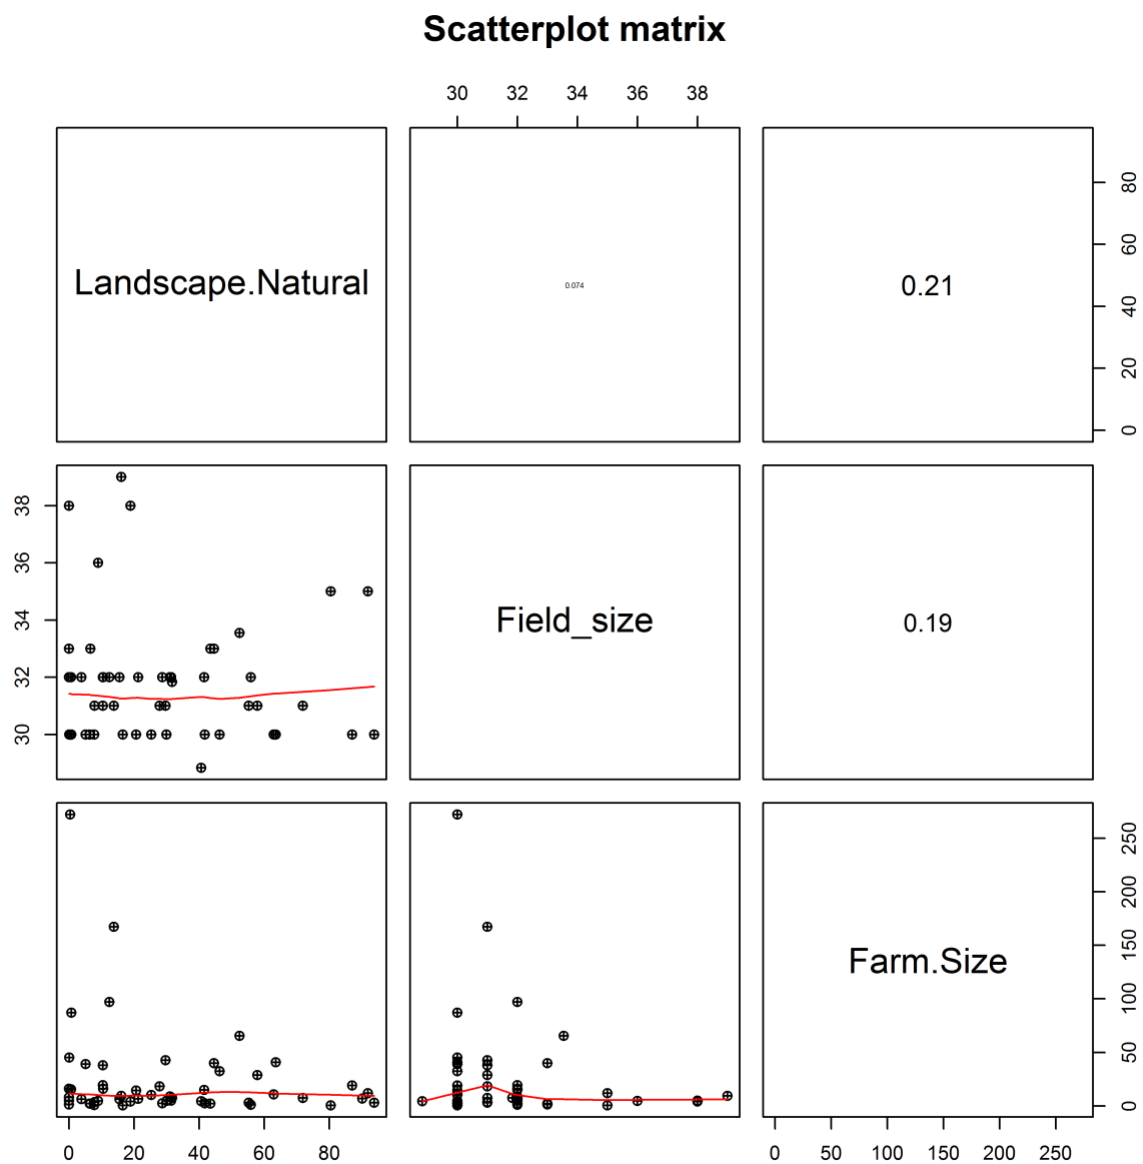

**Fig. S7.** Pairwise scatterplot showing Pearson's  $R^2$  correlations between percentage natural habitat in the landscape, average field size in the landscape, and size of the farm surveyed.

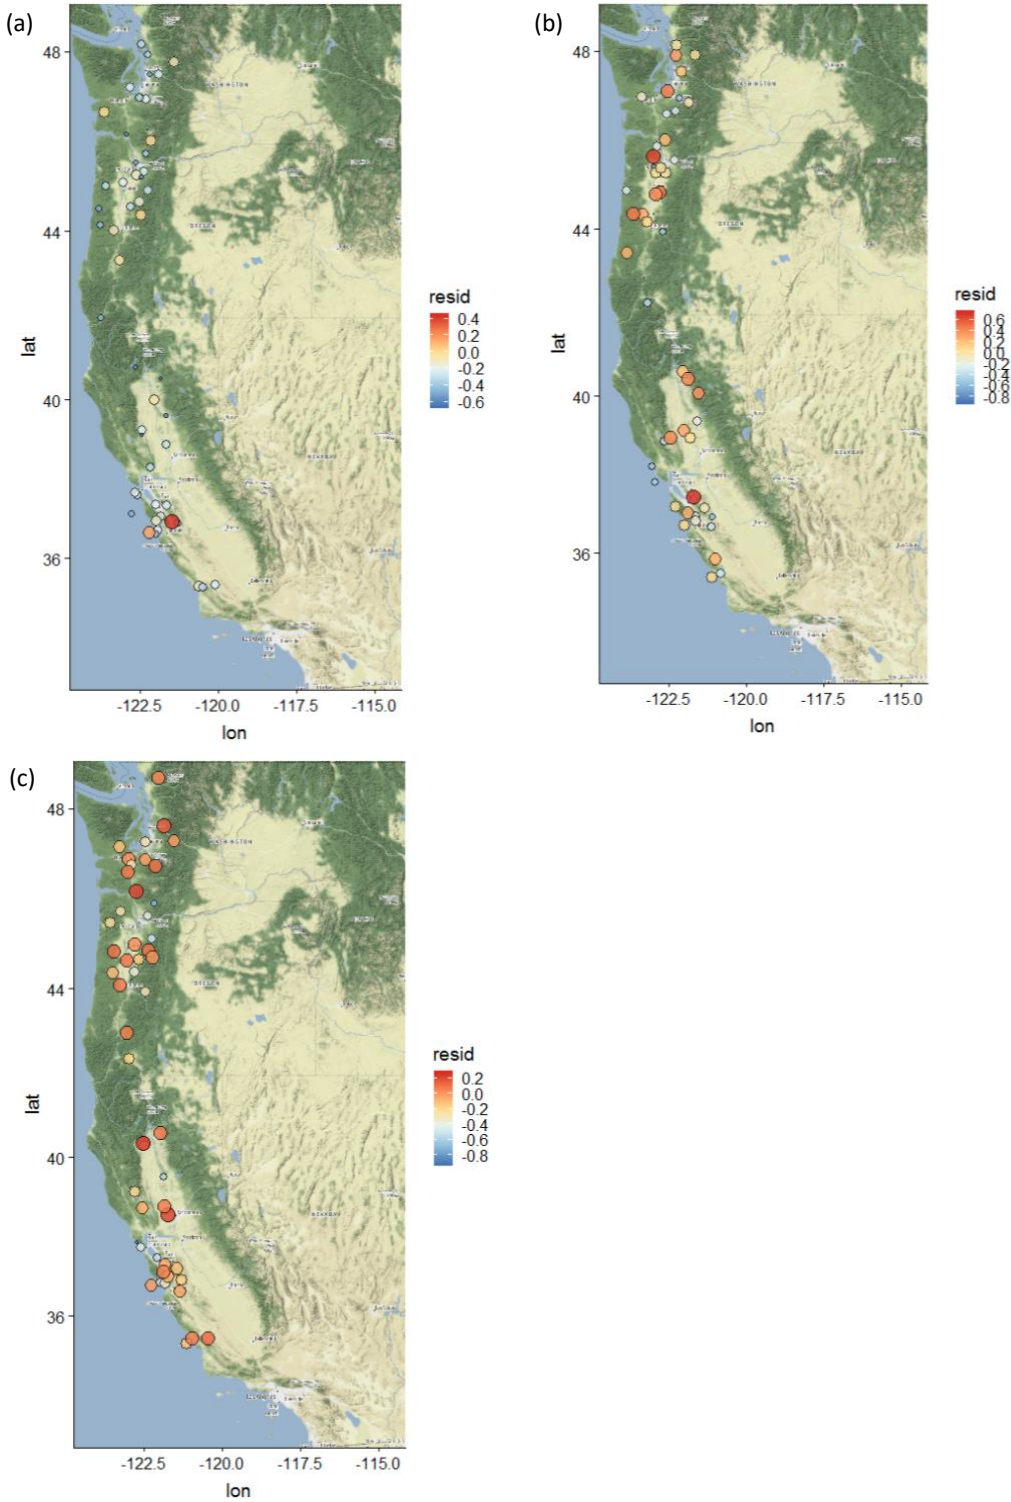

**Fig. S8.** Spatial residuals for (a) non-native bird density, (b) native bird density, and (c) native bird richness.



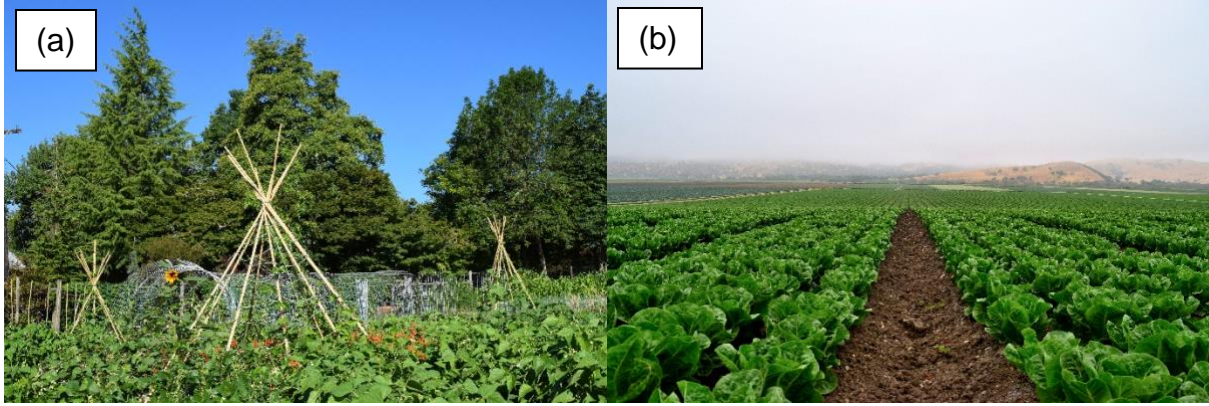

**Fig. S9.** Photos showing example of (a) a small farm and (b) a large farm.

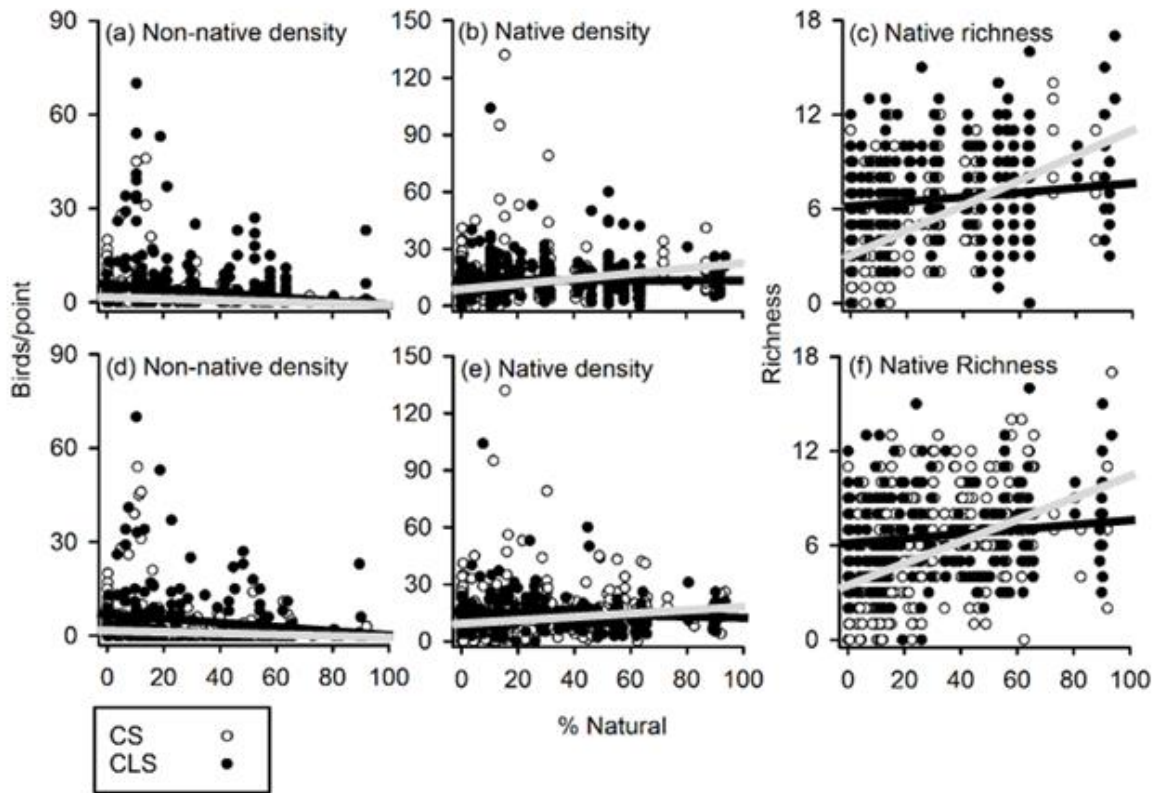

**Fig. S10.** Interactions between farming system (crop system (CS) and crop–livestock system (CLS) and % natural habitat in the landscape for (a) non-native species density, (b) native species density, and (c) native species richness. Interactions between livestock presence at survey point and % natural habitat in the landscape for (a) non-native species density, (b) native species density, and (c) native species richness.

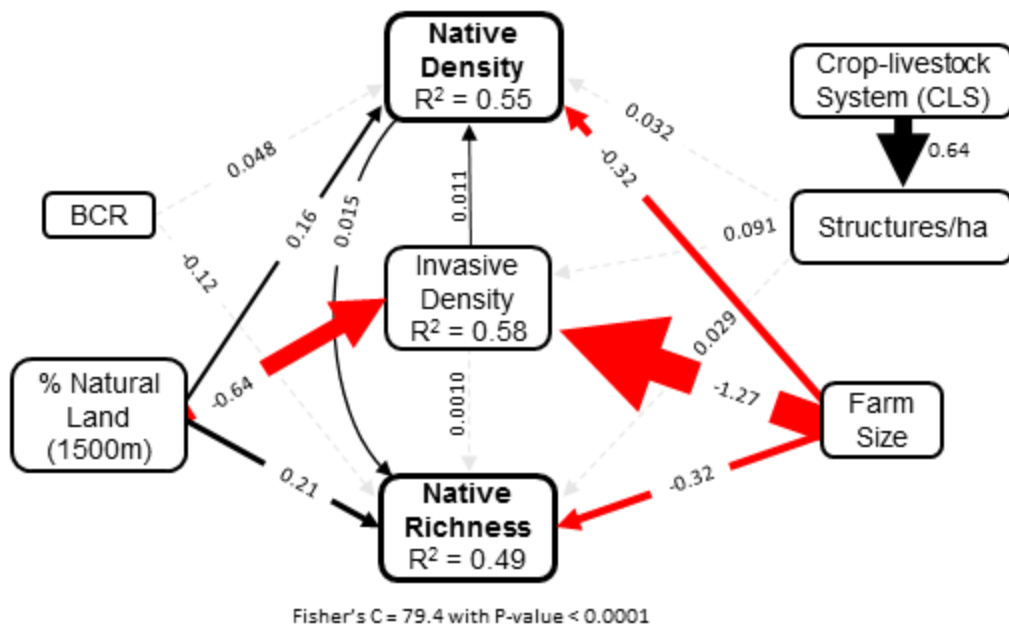

**Fig. S11.** Example of structural equation model presented in Table S5 with an indirect effect of livestock integration on wild bird communities.

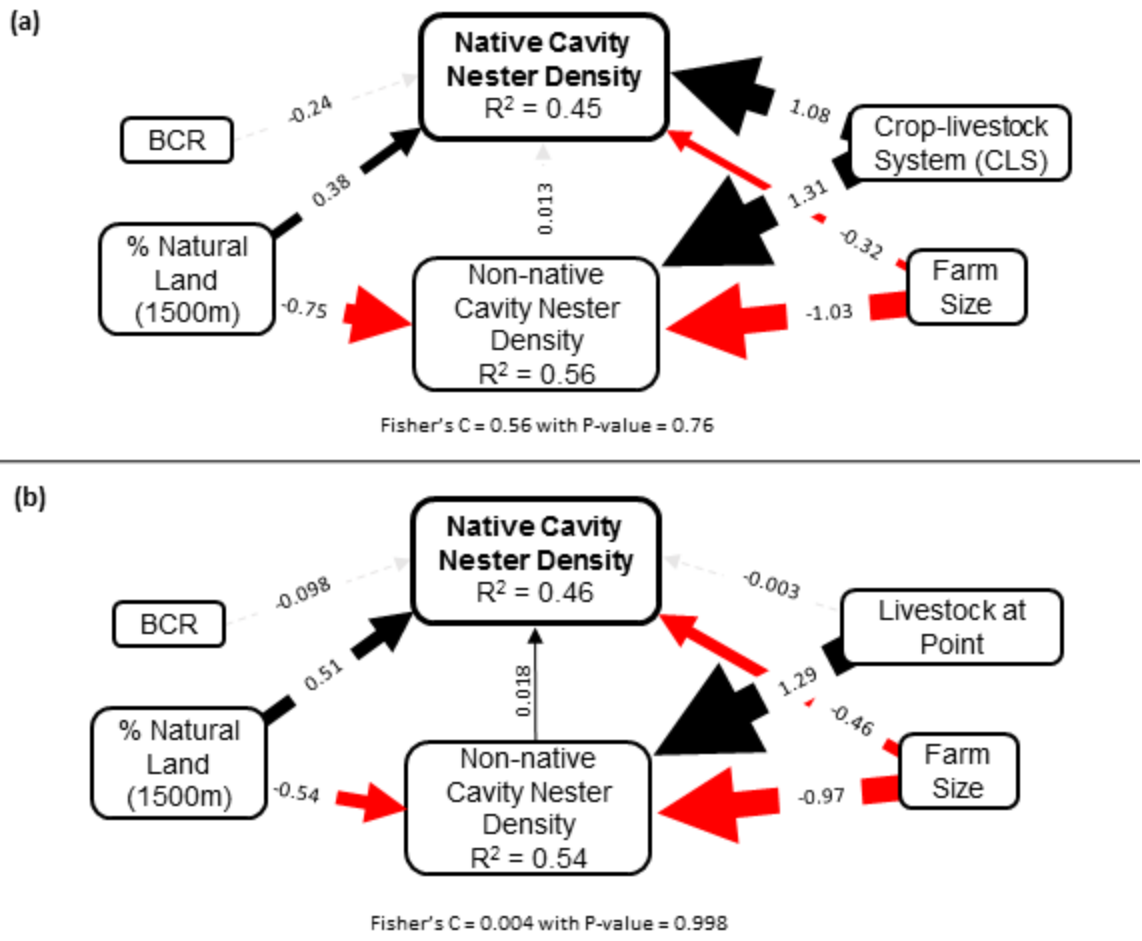

**Fig. S12.** Structural equation model showing links between (a) Bird Conservation Region (BCR), % natural land cover, crop–livestock system (CLS), farm size, non-native cavity nester density and native cavity nester density, and (b) % natural land cover buffered around a point, livestock presence at point, farm size, non-native cavity nester density and native cavity nester density. Black solid lines indicate positive relationships, red solid arrows indicate negative relationships, solid circles indicate interactions, and dashed gray lines indicate non-significant relationships. Lines are scaled to coefficients.

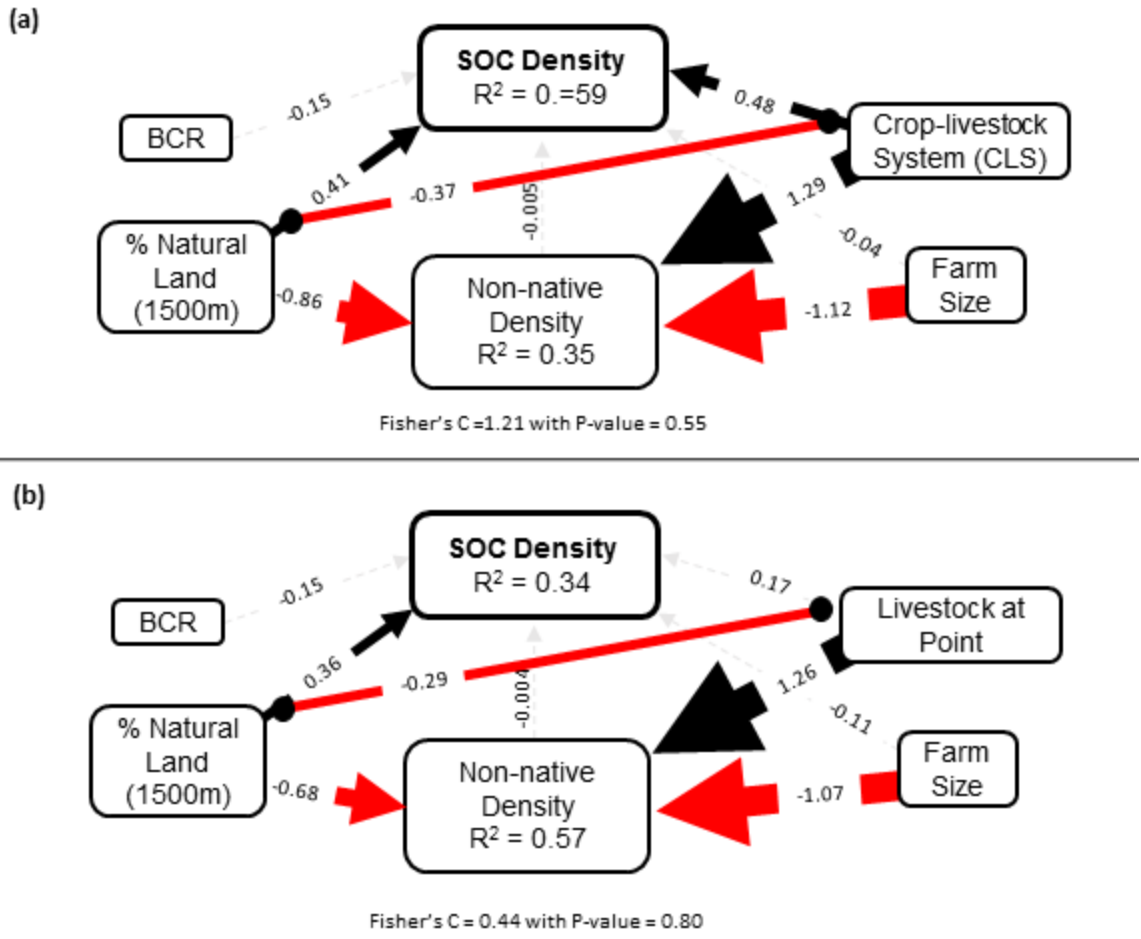

**Fig. S13.** Structural equation model showing links between (a) Bird Conservation Region (BCR), % natural land cover, crop–livestock system (CLS), farm size, species of concern (SOC) density and non-native density, and (b) % natural land cover buffered around a point, livestock presence at point, farm size, species of concern (SOC) density and non-native density. Black solid lines indicate positive relationships, red solid arrows indicate negative relationships, solid circles indicate interactions, and dashed gray lines indicate non-significant relationships. Lines are scaled to coefficients.
